# Supplementary material for: Simultaneous imaging of cancer biomarkers in live cells based on DNA-engineered exosomes
Source: Royal Society of Chemistry journal article supplement (doi:10.1039/d0an02353a), 2021-01-01
Supplement: d0an02353a1.pdf [file d0an02353a1.pdf]

## SUPPORTING INFORMATION

### **Simultaneous imaging of cancer biomarkers in live cells based on DNA-engineered exosomes**

Meng-Li Chen,<sup>a</sup> Fang He,<sup>a</sup> Bin-Cheng Yin<sup>\*abc</sup> Bang-Ce Ye<sup>\*abc</sup>

<sup>a</sup> Lab of Biosystem and Microanalysis, State Key Laboratory of Bioreactor Engineering, East China University of Science and Technology, Shanghai, 200237, China

<sup>b</sup> Institute of Engineering Biology and Health, Collaborative Innovation Center of Yangtze River Delta Region Green Pharmaceuticals, College of Pharmaceutical Sciences, Zhejiang University of Technology, Hangzhou 310014, Zhejiang, China

<sup>c</sup> School of Chemistry and Chemical Engineering, Shihezi University, Xinjiang, 832000, China

\*Corresponding author: Bin-Cheng Yin, Email: binchengyin@ecust.edu.cn; Bang-Ce Ye, Email: bcye@ecust.edu.cn

## Supporting figures and table

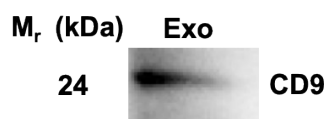

**Fig. S1** Western blot image of CD9 protein from purified exosomes using an exoEasy Mid kit. The total protein content of the exosome sample was 20  $\mu$ g.

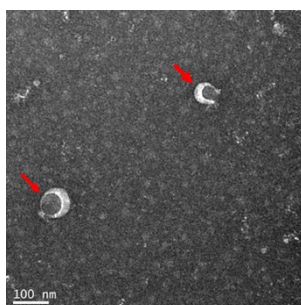

**Fig. S2** Transmission electron microscopy image of exosomes purified from HEK 293T cell culture supernatant.

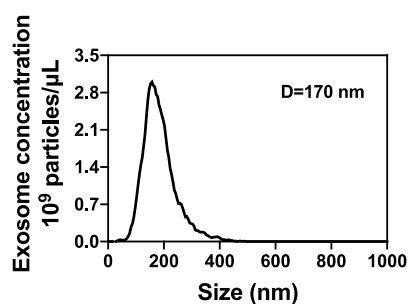

**Fig. S3** Characterization of exosome size. The size distribution of purified exosomes was characterized by NTA. The mean diameter of exosome was ca. 170 nm.

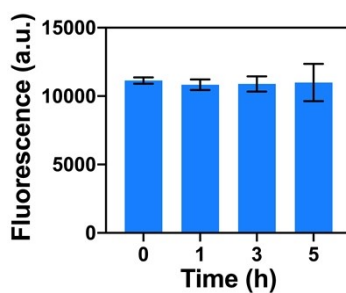

**Fig. S4** Stability investigation of FAM-tagged DNA tethers on exosome surface. The FAM fluorescence recovery kinetics of 50  $\mu$ g/mL FAM-ssDNA-Exos incubated in DMEM medium for different times (0, 1, 3 and 5 h).

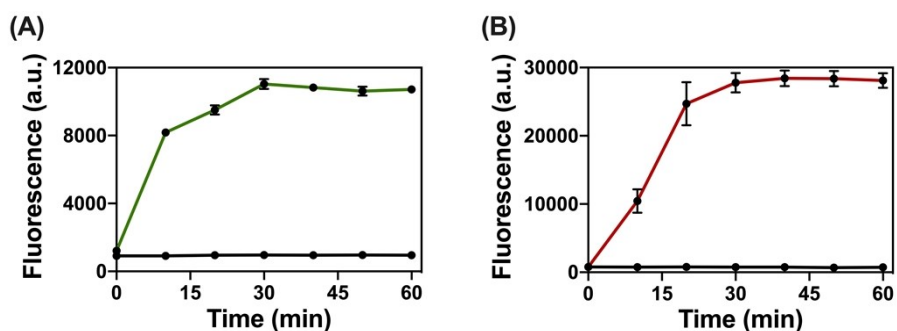

**Fig. S5** Feasibility investigation of AP-B and HP towards MUC1 and DNA-21 in vitro, respectively. (A) The FAM fluorescence recovery kinetics of 200 nM AP-B incubated with 200 nM MUC1. (B) The Cy3 fluorescence recovery kinetics of 100 nM HP incubated with 100 nM DNA-21.

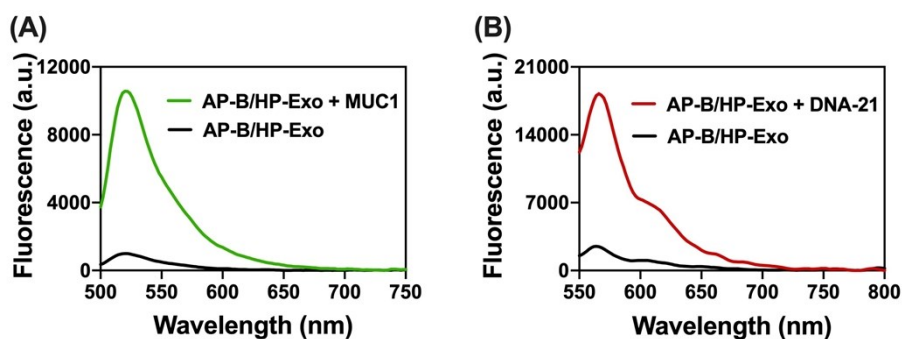

**Fig. S6** Feasibility investigation of AP-B/HP-Exo towards detection of MUC1 and DNA-21 in vitro, respectively. (A) The fluorescence spectra of 20 µg/mL AP-B/HP-Exos incubated with 200 nM MUC1 in PBS at 37 °C for 45 min. (B) The fluorescence spectrum changes of 20 µg/mL AP-B/HP-Exos incubated with 100 nM DNA-21 in PBS at 37 °C for 45 min.

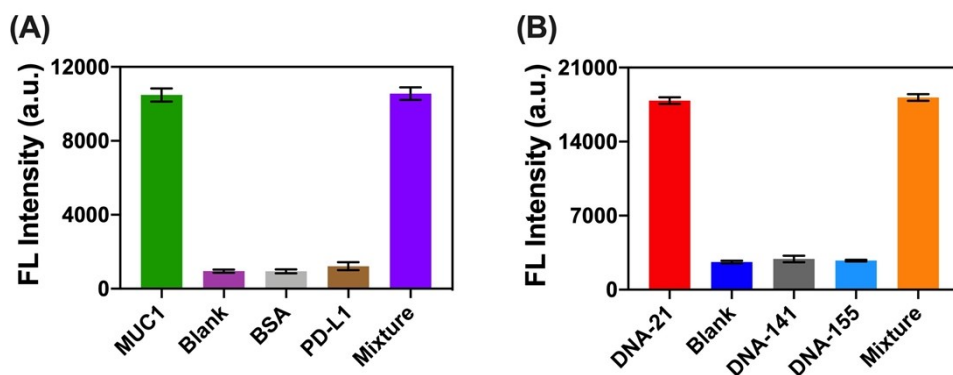

**Fig. S7** Selectivity investigation of AP-B/HP-Exo towards detection of MUC1 and DNA-21 in vitro, respectively. (A) The fluorescence intensities of 20 µg/mL AP-B/HP-Exos incubated with 200 nM MUC1 and their analogues and mixture, respectively. (B) The fluorescence intensities of 20 µg/mL AP-B/HP-Exos incubated with 100 nM DNA-21

and their analogues and mixture, respectively.

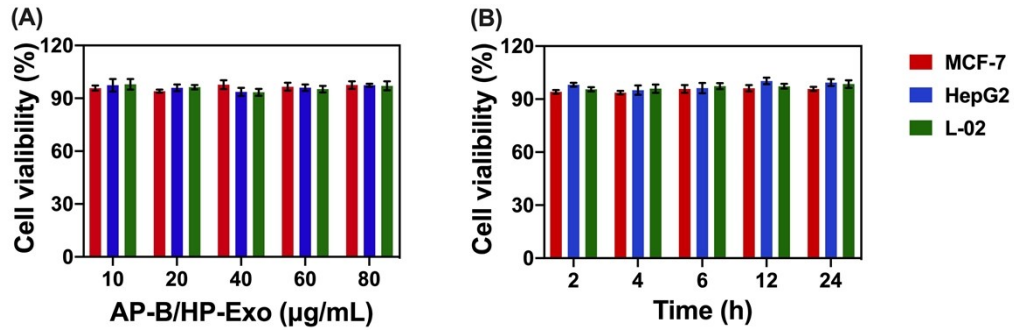

**Fig. S8** Cytotoxicity investigation of AP-B/HP-Exo on MCF-7, HepG2 and L-02 cells analyzed with the CCK-8 assay. **(A)** Cell viability of MCF-7, HepG2 and L-02 cells incubated with various concentrations (10, 20, 40, 60 and 80 µg/mL) of AP-B/HP-Exos at 37 °C for 4 h. **(B)** Cell viability of MCF-7, HepG2 and L-02 cells incubated with 40 µg/mL AP-B/HP-Exos for different times (2, 4, 6, 12 and 24 h) at 37 °C.

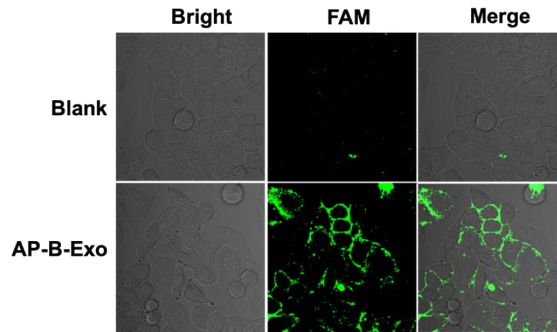

**Fig. S9** Confocal microscopy images of MCF-7 cells incubated with 40 µg/mL AP-B-Exos for 90 min. MCF-7 cells in 500 µL DMEM were set as a blank.

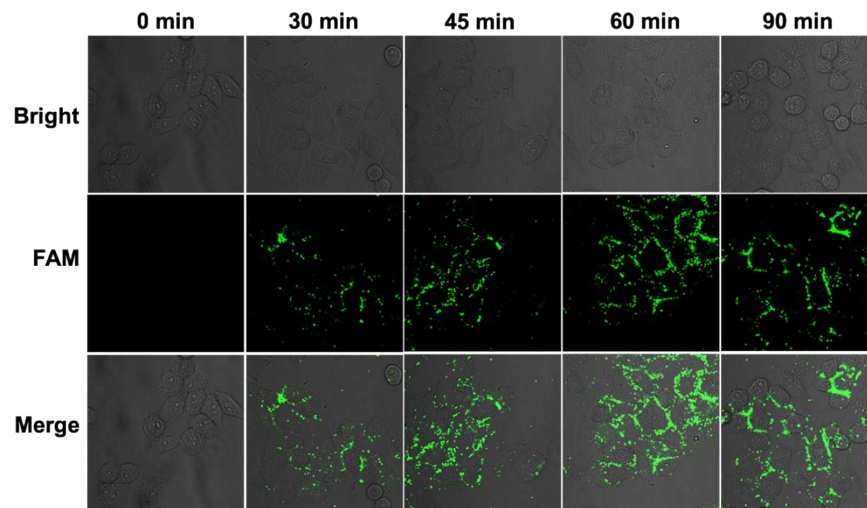

**Fig. S10** Investigation of MCF-7 cells incubating with AP-B-Exo at different time points. Confocal microscopy images of MUC1 in MCF-7 cells incubated with 40 µg/mL AP-B-Exos for 0, 30, 45, 60, and 90 min.

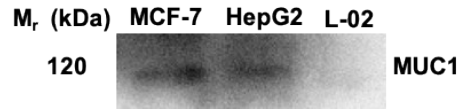

**Fig. S11** Western blot analysis of the MUC1 expression in the MCF-7, HepG2, and L-02 cells.

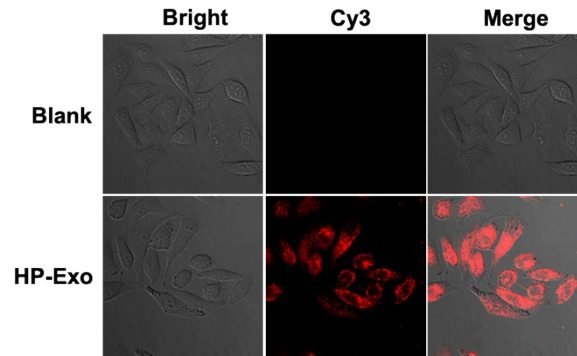

**Fig. S12** Confocal microscopy images of MCF-7 cells incubated with 20 µg/mL HP-Exos for 90 min. MCF-7 cells in 500 µL DMEM were set as a blank.

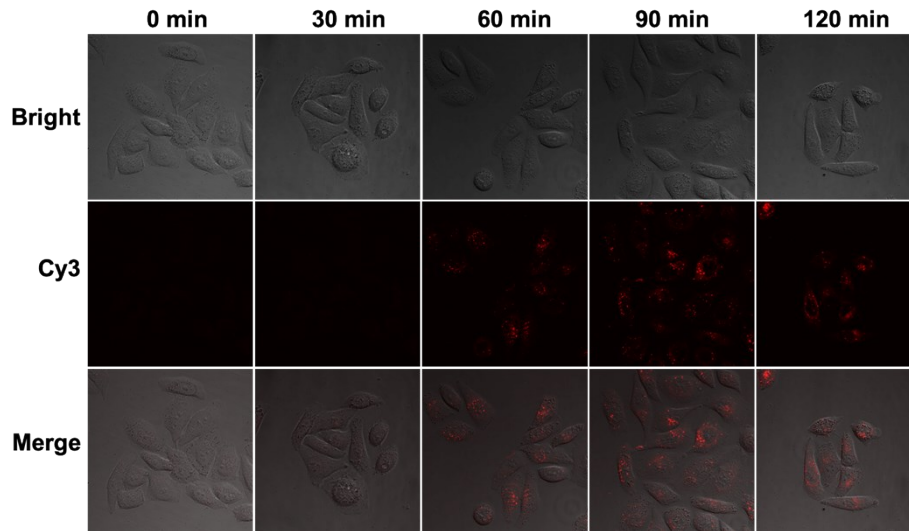

**Fig. S13** Investigation of MCF-7 cells incubating with HP-Exo at different times. Confocal microscopy images of miR-21 in MCF-7 cells incubated with 20 µg/mL HP-Exos for 0, 30, 60, 90, and 120 min.

**Table S1.** Sequence information of oligonucleotides used in this work

| <b>Name</b>           | <b>Sequence (5'-3')</b>                                                    |
|-----------------------|----------------------------------------------------------------------------|
| AP                    | FAM-TTTTTTGCAGTTCCTTTGGATACCCTGG                                           |
| B                     | BHQ1-CAAACCAACTGCTTTTTTTTT-Cholesterol                                     |
| HP                    | BHQ2-TAGCTTATCCAGGGTATCCATCAACATCAGTCTGATAAGCTA-Cy3-TTTTTT-<br>Cholesterol |
| FAM-ssDNA             | FAM-GCAGTTGATCCTTTGGATACCCTGGTTTTTTTT-Cholesterol                          |
| DNA-21                | TAGCTTATCAGACTGATGTTGA                                                     |
| DNA-141               | CATCTCCAGTACAGTGTTGGA                                                      |
| DNA-155               | TTAATGCTAATCGTGATAGGGGT                                                    |
| miR-21 forward primer | ACACTCCAGCTGGGTAGCTTATCAGACTG                                              |
| miR-21 reverse primer | CTCAACTGGTGTGCGTGGAGTCGGCAATTCAGTTGAGTCAACATC                              |
